# Supplementary material for: MRTF/SRF dependent transcriptional regulation of TAZ in breast cancer cells
Source: PubMed Central journal article supplement (PMC4924672; doi:10.18632/oncotarget.7333), 2016-02-11
Supplement: oncotarget-07-13706-s001.pdf [file oncotarget-07-13706-s001.pdf]

## MRTF/SRF dependent transcriptional regulation of TAZ in breast cancer cells

### Supplementary Materials

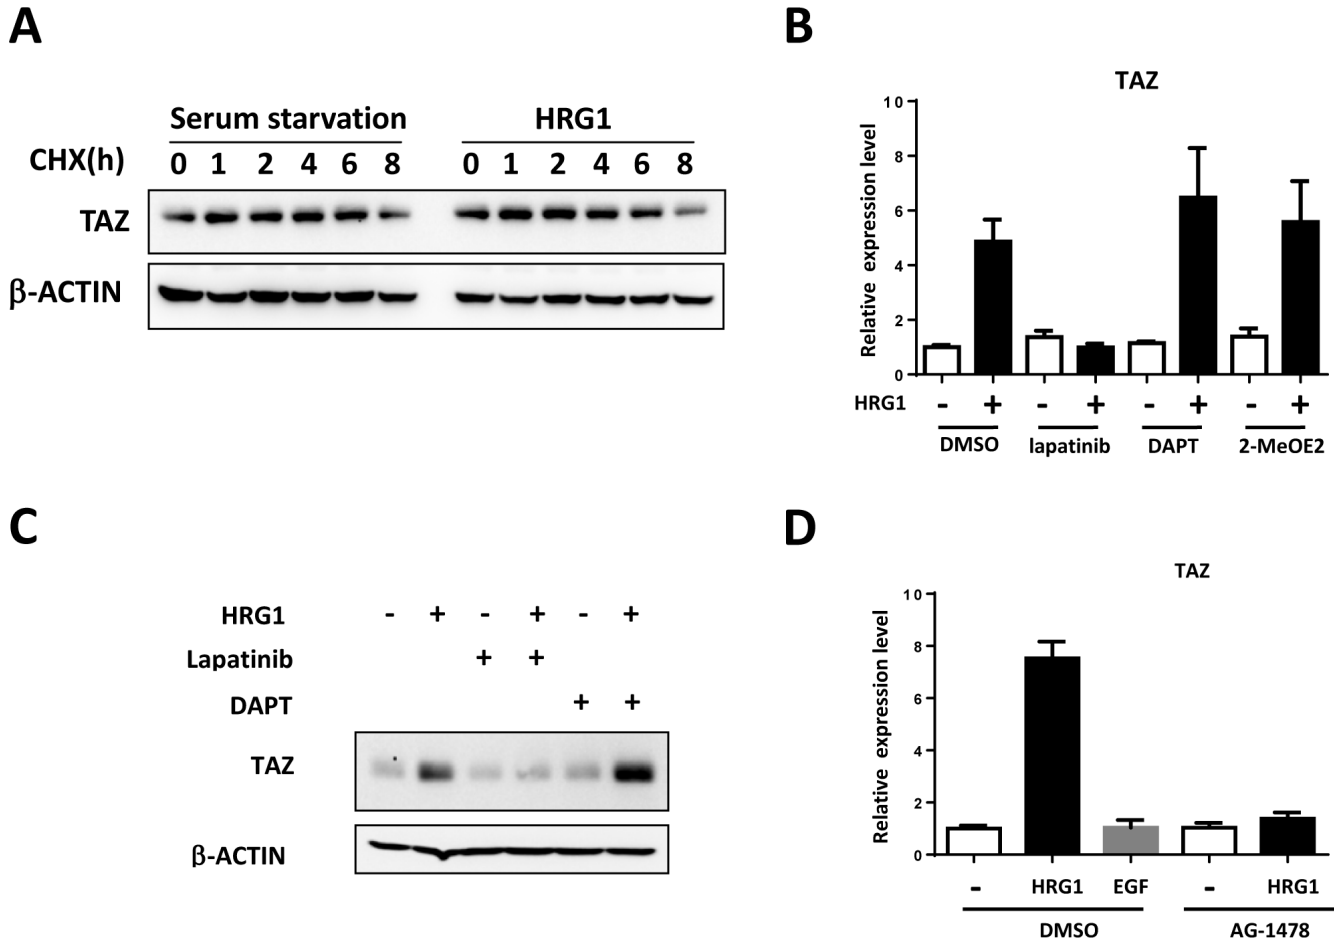

**Supplementary Figure S1: Protein stability control, ERBB4-ICD and HIF1α are not involved in the TAZ induction by HRG1 in breast cancer cells.** (A) HRG1 didn't affect TAZ stability. MCF7 cells were serum-starved for overnight. After 1 h HRG1 treatment, cells were treated with CHX for indicated time. (B, C, D) Activation of ERBB receptor, but not the EGF, production of ERBB4-ICD and HIF1α were required for the TAZ induction by HRG1. Cells were treated or pre-treated with indicated compounds for 1 h, then with HRG1 for 4 h. lapatinib (1 μM), DAPT (10 μM), 2-MeOE2 (100 μM), AG-1478 (1 μM), EGF (50 ng).

**A**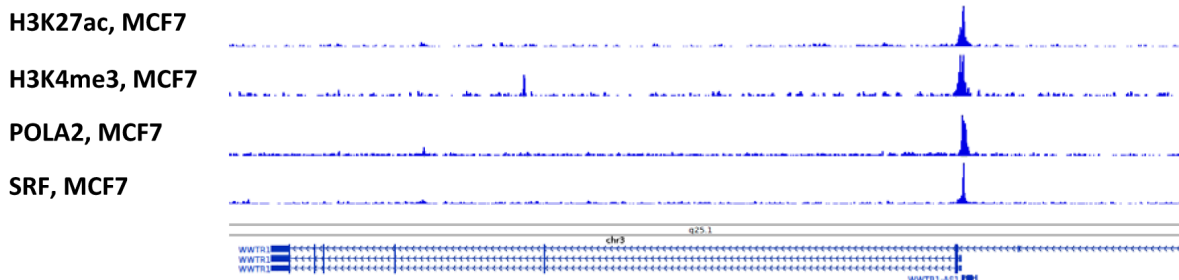**B**

**SRF consensus motif: CC (A/T)<sub>6</sub> GG**

**TAZ promoter : CCAAATATGG**

**MUT promoter: TTAAATATAA**

```

GGCACTTTCTGGGCACCGTCTGTGCTCTAGCAGACAATTGAGAGCCAGGC -601
AGCCAAGATGCCTCCTCGCCAGA CCAAATATGGTCACAAGAGCTAAGCAG -551
CCTCTCGTGGAAAAGCTGGCCTTGTTGGTGTCTCCCCGCGCCGGGGCGCA -501
CCCGGGCCGGCCTTCGGGCAGAATCGCGGGTCAGTGCGGCGCTCCGGGTG -451
CTGCAGGCCTCGGCGCCTGGCTGCAGGGGAGGGCGCGGTGTCCAGGACCG -401
GCCCTTCCTAGGCCTGAGCCCCTCATCCGCGTGCCCTCCGCCACCCCGG -351
CCTTGGTTTTCGGTCCACAACCCCTTGATGAAACAGGCTCAGGCCACTTTC -301
CCTTTGATCCCGCCCCAAGTCCGTGGTAAACTCAAAGGAATGCAGATGCA -251
GGTCTGAGCGGGAGAGGTCCGCGCGGGCCGGGAGGAGTGGGTGGGGGGCAC -201
CCGTCTCCTCTTACCCAGTAAAGTACCCATCACGCCCAGGGTTTTTCTGGA -151
GCCGAGGTGGGAGGAGGAGGAGGAGGAAGAGGAGGGGCGAGCGGGGGCTG -101
GCCGGCTAGGGACTAGGAGGTCATACATAATTCAACAGCTCAACTTTTCGG -51
GCCCGCCTCTTTCCTGGGGGTGGGAGTTTGCTCCAAACTTTGTTTATGGG -1

```

**Supplementary Figure S2:** (A) Transcriptional starting sites of TAZ in MCF7 cells. ChIP-seq data were extracted from Cistrome database and presented to show TAZ gene. (B) TAZ promoter possessed a SRF CArG box. The position of CArG box in the TAZ promoter and the CArG box mutant were indicated.
